# Supplementary material for: Hand-Rearing, Release and Survival of African Penguin Chicks Abandoned Before Independence by Moulting Parents
Source: PubMed Central journal article supplement (PMC4206437; doi:10.1371/journal.pone.0110794), 2014-10-22
Supplement: pone.0110794.s004.pdf [file pone.0110794.s004.pdf]

Table S1. Numbers of African penguin chicks admitted to SANCCOB after being abandoned by moulting parents on Robben Island, Dyer Island and at Stony Point, 2001-2005.

| <b>Year</b>  | <b>Colony</b> | <b>No. admitted</b> | <b>No. released</b> | <b>Release rate</b> |
|--------------|---------------|---------------------|---------------------|---------------------|
| 2001         | Robben Island | 32                  | 10                  | 31%                 |
|              | Dyer Island   | 1                   | 0                   | 0%                  |
| 2002         | Robben Island | 24                  | 10                  | 42%                 |
| 2003         | Robben Island | 4                   | 2                   | 50%                 |
|              | Dyer Island   | 81                  | 48                  | 59%                 |
| 2004         | Robben Island | 6                   | 3                   | 50%                 |
|              | Dyer Island   | 93                  | 49                  | 53%                 |
| 2005         | Robben Island | 3                   | 0                   | 0%                  |
|              | Dyer Island   | 57                  | 37                  | 65%                 |
| <b>Total</b> |               | <b>301</b>          | <b>159</b>          | <b>53%</b>          |
