# Supplementary material for: Hand-Rearing, Release and Survival of African Penguin Chicks Abandoned Before Independence by Moulting Parents
Source: PubMed Central journal article supplement (PMC4206437; doi:10.1371/journal.pone.0110794), 2014-10-22
Supplement: pone.0110794.s005.pdf [file pone.0110794.s005.pdf]

Table S2. The number of African penguin chicks removed from September to December 2006 and 2007, compared to the number of breeding pairs at Dyer Island, Robben Island and Stony Point.

| <b>Colony</b> | <b>Year</b> | <b>No. chicks removed</b> | <b>No. breeding pairs</b> | <b>chick/breeding pair</b> |
|---------------|-------------|---------------------------|---------------------------|----------------------------|
| Dyer Island   | 2006        | 694                       | 2057                      | 0.34                       |
|               | 2007        | 427                       | 1513                      | 0.28                       |
| Robben Island | 2006        | 113                       | 3697                      | 0.03                       |
|               | 2007        | 7                         | 5935                      | 0.001                      |
| Stony Point   | 2006        | 34                        | 265                       | 0.13                       |
|               | 2007        | 47                        | 260                       | 0.18                       |

The number of breeding pairs is based on annual count data presented in Crawford et al. 2011, reference [3] in the main text.
