# Supplementary material for: Hand-Rearing, Release and Survival of African Penguin Chicks Abandoned Before Independence by Moulting Parents
Source: PubMed Central journal article supplement (PMC4206437; doi:10.1371/journal.pone.0110794), 2014-10-22
Supplement: pone.0110794.s006.pdf [file pone.0110794.s006.pdf]

Table S3. Numbers of abandoned African penguin chicks admitted to SANCCOB between September and December, 2006 and 2007, subsequently released according to area of origin and area of release, with number of banded individuals.

| <b>Year</b>  | <b>Colony of Origin</b> | <b>Colony of Release</b> | <b>No. birds</b> | <b>No. banded birds</b> |
|--------------|-------------------------|--------------------------|------------------|-------------------------|
| 2006         | Stony Point             | Robben Island            | 29               | 29                      |
|              | Dyer Island             | Dyer Island              | 322              | 207                     |
|              |                         | Robben Island            | 325              | 215                     |
|              | Robben Island           | Robben Island            | 90               | 60                      |
| 2007         | Stony Point             | Dyer Island              | 12               | 4                       |
|              |                         | Robben Island            | 12               | 2                       |
|              | Dyer Island             | Dyer Island              | 201              | 158                     |
|              |                         | Robben Island            | 123              | 24                      |
|              | Robben Island           | Dyer Island              | 3                | 2                       |
| <b>Total</b> |                         |                          | 1117             | 701                     |
