# Supplementary material for: Hand-Rearing, Release and Survival of African Penguin Chicks Abandoned Before Independence by Moulting Parents
Source: PubMed Central journal article supplement (PMC4206437; doi:10.1371/journal.pone.0110794), 2014-10-22
Supplement: pone.0110794.s007.pdf [file pone.0110794.s007.pdf]

Table S4. Numbers of African penguin chicks admitted for hand-rearing at SANCCOB, released or that died between September and December 2006 and 2007 which were positive for avian malaria and percentages of the total in each case.

|               | 2006       |             |             | 2007       |             |             |
|---------------|------------|-------------|-------------|------------|-------------|-------------|
|               | Admissions | Releases    | Deaths      | Admissions | Releases    | Deaths      |
| No. birds     | 114        | 81          | 33          | 112        | 42          | 70          |
| % of category | 14%        | 11%         | 43%         | 23%        | 12%         | 54%         |
| Mean $\pm$ SD |            |             |             |            |             |             |
| duration      | –          | 58 $\pm$ 23 | 53 $\pm$ 26 | –          | 81 $\pm$ 27 | 58 $\pm$ 26 |
| (d)           |            |             |             |            |             |             |

The mean  $\pm$  standard deviation (SD) duration in days (d) from admission to release or death is also shown.
