# Supplementary material for: Hand-Rearing, Release and Survival of African Penguin Chicks Abandoned Before Independence by Moulting Parents
Source: PubMed Central journal article supplement (PMC4206437; doi:10.1371/journal.pone.0110794), 2014-10-22
Supplement: pone.0110794.s008.pdf [file pone.0110794.s008.pdf]

Table S5. Additional information on the 12 hand-reared chicks that had recruited into the breeding population by December 2012.

| <b>SAFRING Number</b> | <b>Date of capture</b> | <b>Origin</b> | <b>Release date</b> | <b>Release method</b> | <b>Release site</b> | <b>First resighting date</b> | <b>Breeding at</b> | <b>No. times seen breeding</b> | <b>Age at first breeding (years)</b> |
|-----------------------|------------------------|---------------|---------------------|-----------------------|---------------------|------------------------------|--------------------|--------------------------------|--------------------------------------|
| A12154                | 17 Oct. 2006           | DYI           | 19 Dec. 2006        | B                     | ROI                 | 28 May 2009                  | ROI                | 1                              | 2.4                                  |
| A12430                | 17 Oct. 2006           | DYI           | 15 Nov. 2006        | C                     | ROI                 | 04 May 2010                  | ROI                | 4                              | 3.5                                  |
| A12431                | 17 Oct. 2006           | DYI           | 09 Nov. 2006        | C                     | ROI                 | 10 Apr. 2010                 | ROI                | 1                              | 3.4                                  |
| A12448                | 17 Oct. 2006           | DYI           | 09 Nov. 2006        | C                     | ROI                 | 20 Jul. 2009                 | DYI                | 2                              | 2.7                                  |
| A12766                | 17 Oct. 2006           | DYI           | 21 Nov. 2006        | C                     | DYI                 | 01 Jun. 2008                 | DYI                | 1                              | 1.5                                  |
| A12787                | 21 Oct. 2006           | DYI           | 21 Nov. 2006        | C                     | DYI                 | 03 Apr. 2010                 | DYI                | 1                              | 3.4                                  |
| A12803                | 21 Oct. 2006           | DYI           | 05 Dec. 2006        | B                     | ROI                 | 08 Apr. 2011                 | DAI                | 5                              | 4.3                                  |
| A12820                | 21 Oct. 2006           | DYI           | 28 Nov. 2006        | C                     | DYI                 | 27 Aug. 2009                 | DYI                | 1                              | 2.7                                  |
| A12858                | 21 Oct. 2006           | DYI           | 28 Nov. 2006        | C                     | DYI                 | 29 Aug. 2011                 | STP                | 1                              | 4.8                                  |
| A12953                | 21 Oct. 2006           | DYI           | 28 Nov. 2006        | C                     | DYI                 | 26 Apr. 2010                 | DYI                | 1                              | 3.4                                  |
| A12988                | 21 Oct. 2006           | DYI           | 28 Nov. 2006        | C                     | DYI                 | 17 Mar. 2011                 | STP                | 3                              | 4.3                                  |
| A12997                | 17 Oct. 2006           | DYI           | 28 Nov. 2006        | C                     | DYI                 | 29 May 2011                  | DYI                | 1                              | 4.5                                  |

Abbreviations: SAFRING = South African Bird Ringing Unit; DYI = Dyer Island; ROI = Robben Island; STP = Stony Point; DAI = Dassen Island; B = released from a boat just offshore of Robben Island; C = released on land at the colony listed under Release site.
